# Supplementary material
Source: Copernicus journal article supplement (doi:10.5194/egusphere-2026-2034)
Supplement: Supplementary file 1 [file egusphere-2026-2034-supplement.pdf]

1 **Supplements**

2 *S1. MTM Power Spectra of  $\gamma$  (GRS) and  $\chi$  (MS)*

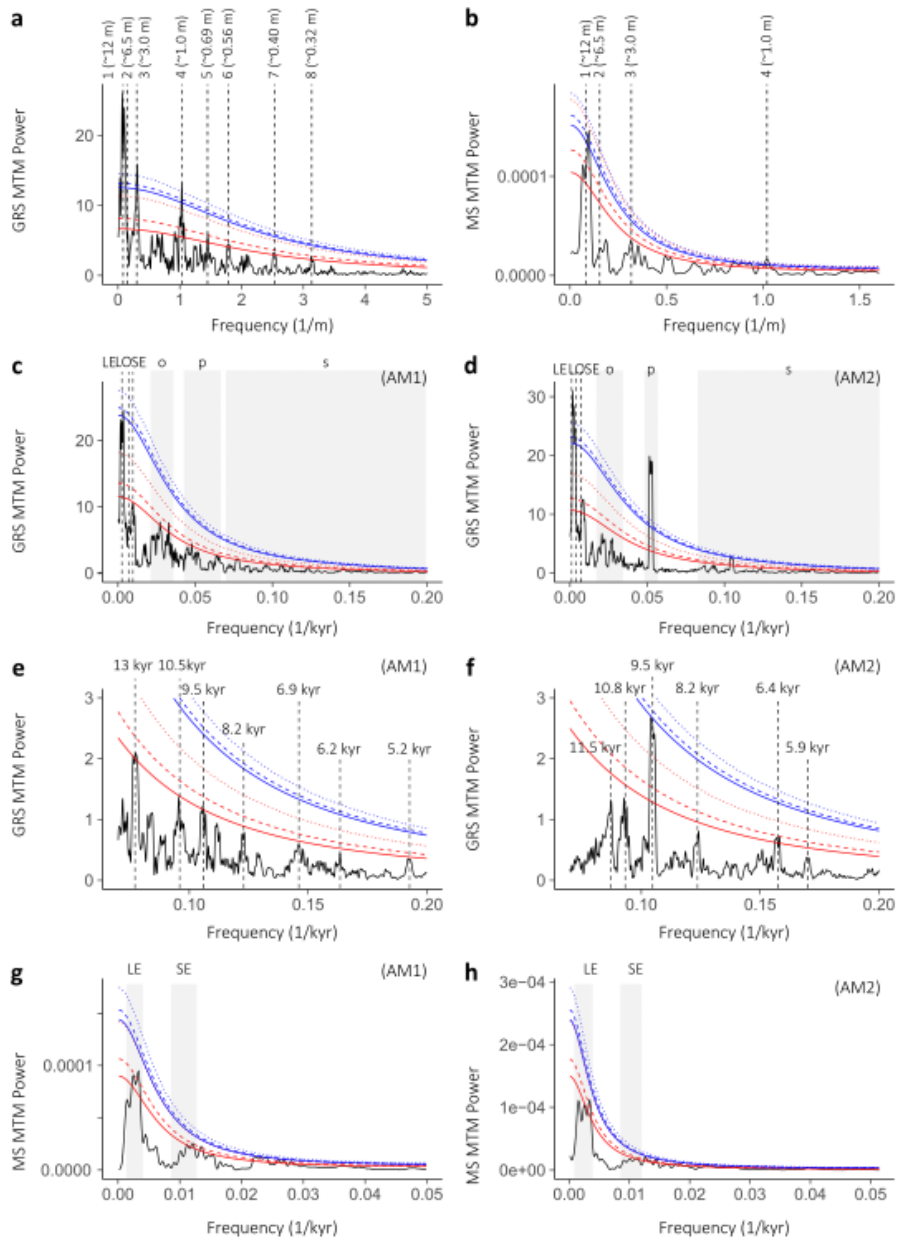

3

4 **Fig. S1. MTM power spectra of  $\gamma$  and  $\chi$ .** a) MTM spectrum of  $\gamma$  with key components and corresponding periods  
 5 numbered 1-8, b) MTM spectrum of  $\chi$  with key components and corresponding periods numbered 1-4, c) MTM  
 6 spectrum of  $\gamma$  tuned according to AM1, d) MTM of  $\gamma$  tuned according to AM2, e) zoom-in of panel c, f) zoom-in of  
 7 panel d, g) MTM spectrum of tuned  $\chi$  according to AM1, h) MTM spectrum of tuned  $\chi$  according to AM2. Classical  
 8 significance testing at 90, 95 and 99 % confidence levels using an autoregressive model of order 1 (AR(1)) is  
 9 included for each spectrum (red full, dashed and dotted red lines, respectively), including Bonferroni corrections  
 10 (blue). Gray boxes indicate spectral bands of 405-kyr long eccentricity (LE), 173-kyr long obliquity (LO), 100-kyr  
 11 short eccentricity (LE), obliquity (o), precession (p) as well as sub-Milankovitch cyclicity (s).

12 S2. Average Sedimentation Rate Estimation using TimeOpt

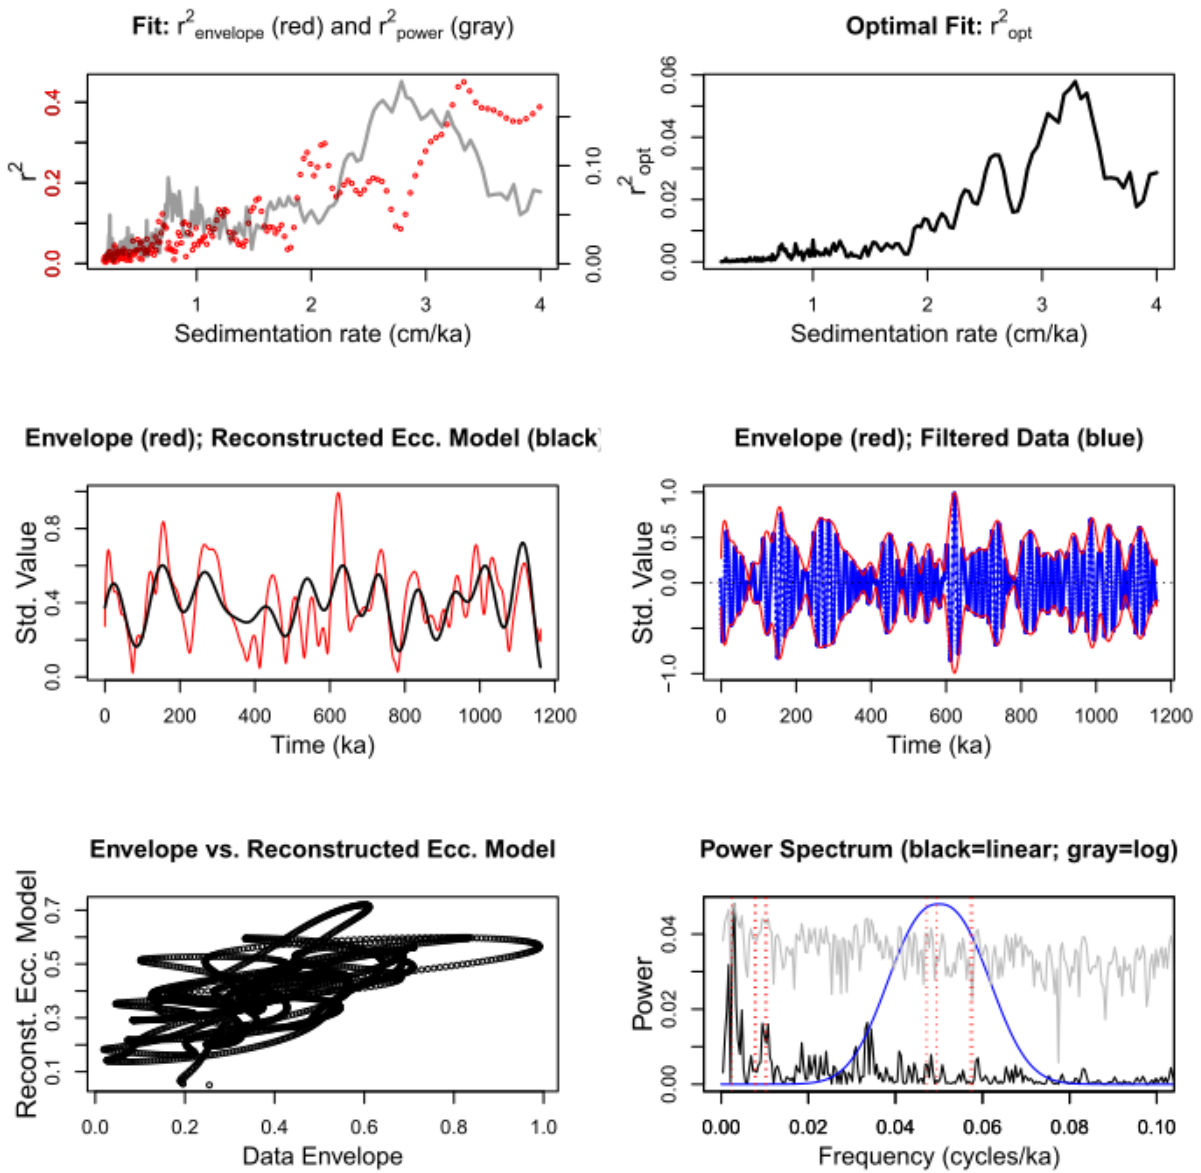

13

14 **Fig. S2. TimeOpt evaluation of GRS  $\gamma$ , precession modulation by eccentricity.** Maximum spectral power  $r^2$  at  
 15 an average sedimentation rate of 2.79 cm/kyr, maximum envelope  $r^2$  at an average sedimentation rate of 3.34  
 16 cm/kyr,  $r^2_{\text{opt}}$  at an average sedimentation rate of 3.29 cm/kyr. Sedimentation rates tested range from 0.2 to 4.0  
 17 cm/kyr.

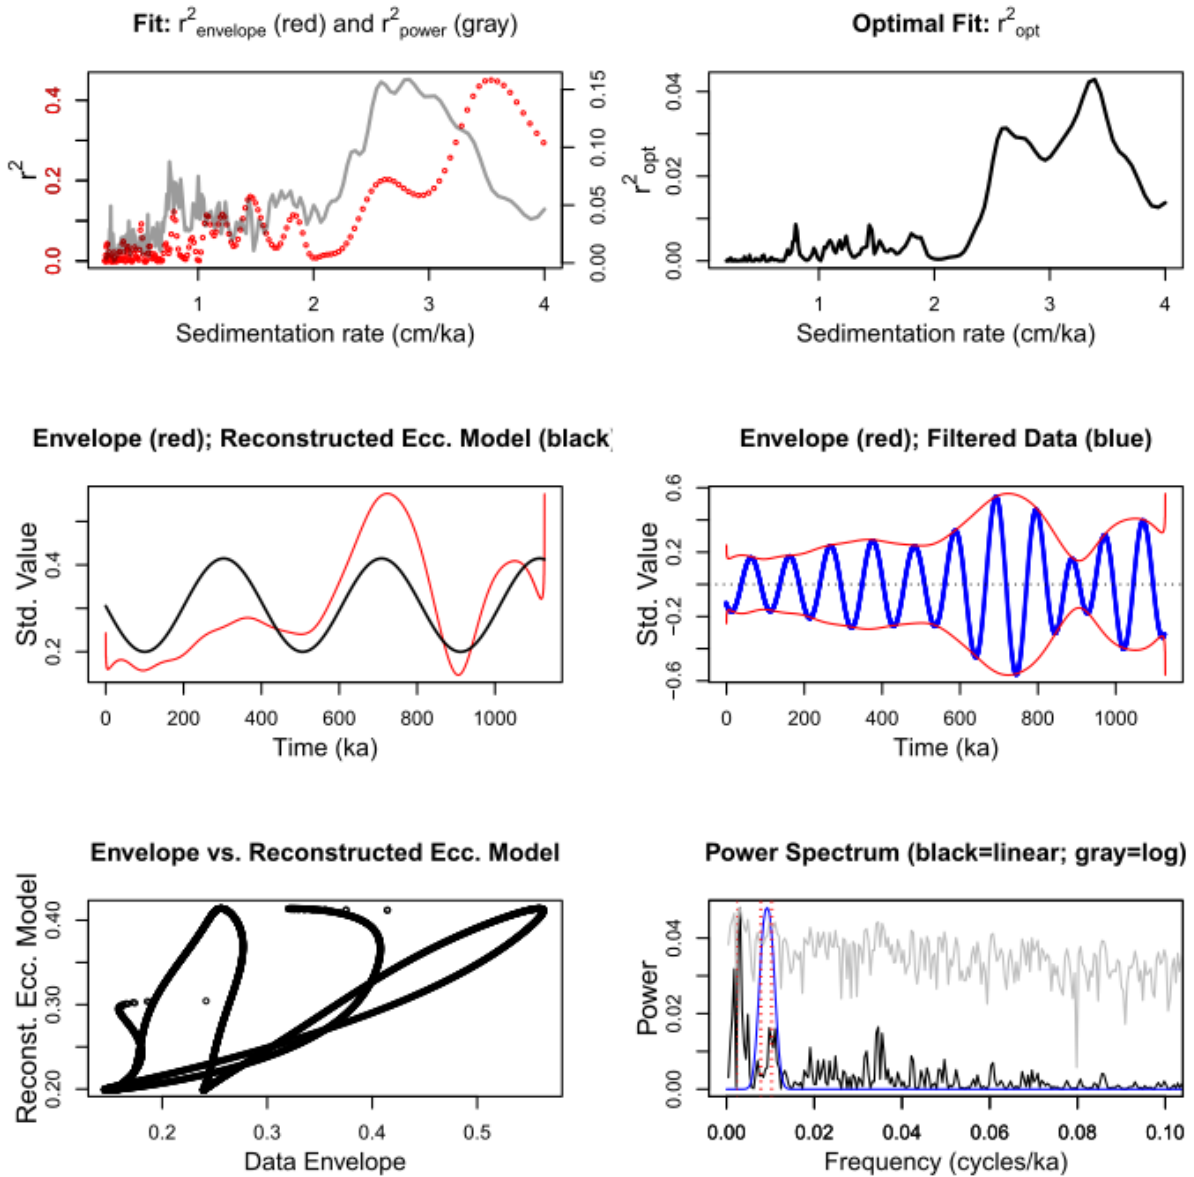

18

19 **Fig. S3. TimeOpt evaluation of GRS  $\gamma$ , short eccentricity modulation by long eccentricity.** Maximum spectral  
 20 power  $r^2$  at an average sedimentation rate of 2.83 cm/kyr, maximum envelope  $r^2$  at an average sedimentation rate  
 21 of 3.55 cm/kyr,  $r^2_{\text{opt}}$  at an average sedimentation rate of 3.39 cm/kyr. Sedimentation rates tested range from 0.2 to  
 22 4.0 cm/kyr.

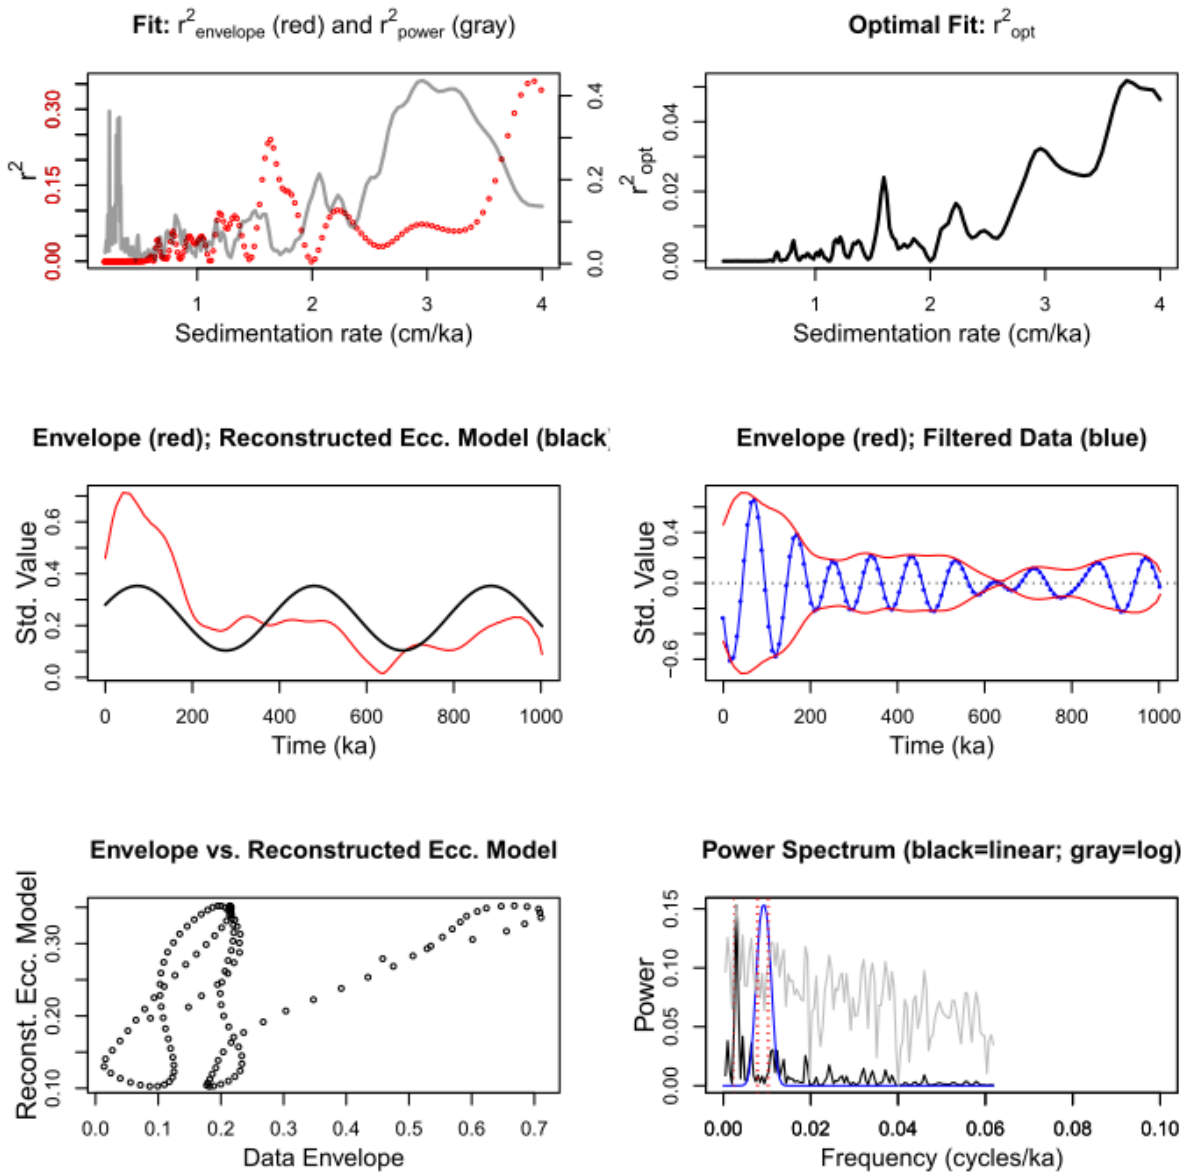

23

24 **Fig. S4. TimeOpt evaluation of MS  $\chi$ , short eccentricity modulation by long eccentricity.** Maximum spectral  
 25 power  $r^2$  at an average sedimentation rate of 2.96 cm/kyr, maximum envelope  $r^2$  at an average sedimentation rate  
 26 of 3.94 cm/kyr,  $r^2_{\text{opt}}$  at an average sedimentation rate of 3.71 cm/kyr. Sedimentation rates tested range from 0.2 to  
 27 4.0 cm/kyr.

28 S3. Cyclostratigraphic Age Model of the Sherburne Formation – Comparison

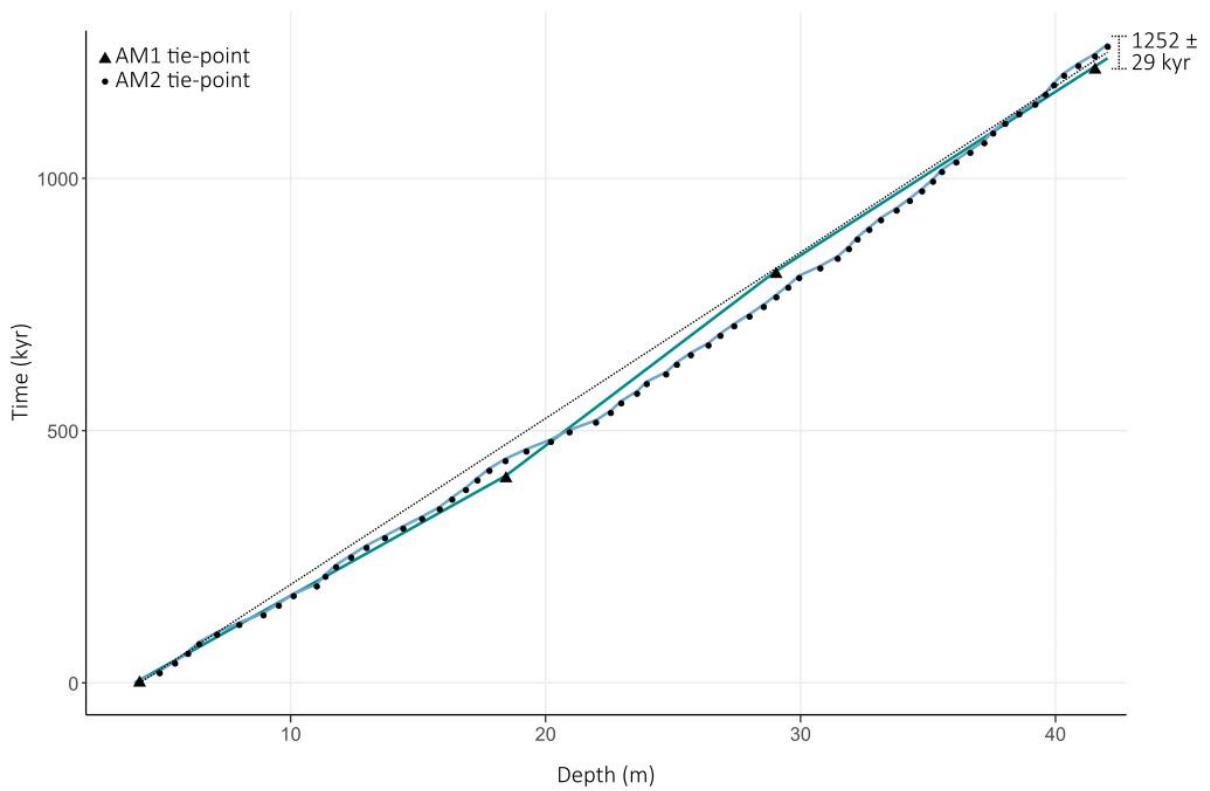

29

30 **Fig. S5. Sherburne Formation sedimentation rate curves.** AM1 (cyan; 405-kyr LE) depth-time tie-points  
31 indicated by black triangles, AM2 (blue; precession) depth-time tie-points indicated by black dots. Dotted line  
32 represents the average sedimentation rate according to an average estimated duration of  $1252 \pm 29$  kyr.

33 **S4. Testing short-eccentricity harmonics**

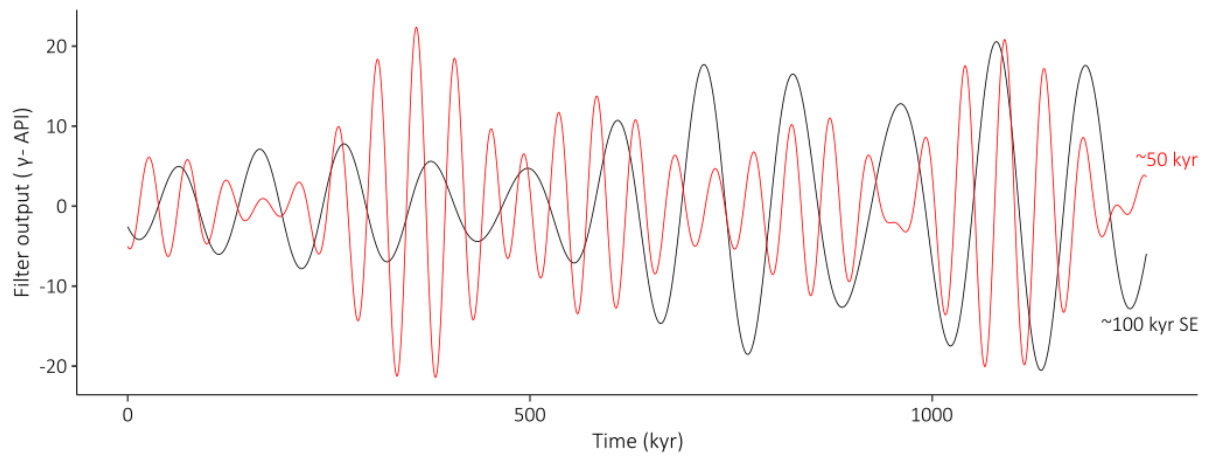

35 **Fig. S6. Extracted short eccentricity and ~50-kyr band.** 100~kyr short eccentricity (SE; black) and ~50-kyr band  
36 (red). The lack of stable phase and amplitude relationships indicates this ~50-kyr band is most probably not a  
37 harmonic of short eccentricity.

38 *S5. Precession-obliquity combination tones*

39 **Table S1. Precession-obliquity combination tones.** Upper-right quadrant represents sum tones, lower-left  
 40 quadrant difference tones.

| Period (kyr) | 34.3        | 21.2  | 20.2  | 17.47  | 17.34 |
|--------------|-------------|-------|-------|--------|-------|
| 34.3         |             | 13.1  | 12.7  | 11.6   | 11.5  |
| 21.2         | <b>55.5</b> |       | 10.3  | 9.6    | 9.5   |
| 20.2         | <b>49.1</b> | 428.2 |       | 9.4    | 9.3   |
| 17.47        | 35.6        | 99.3  | 129.3 |        | 8.7   |
| 17.34        | 35.1        | 95.2  | 122.5 | 2330.2 |       |

41

42 **S6. MTM and EPSA of Tuned  $\gamma$  (GRS)**

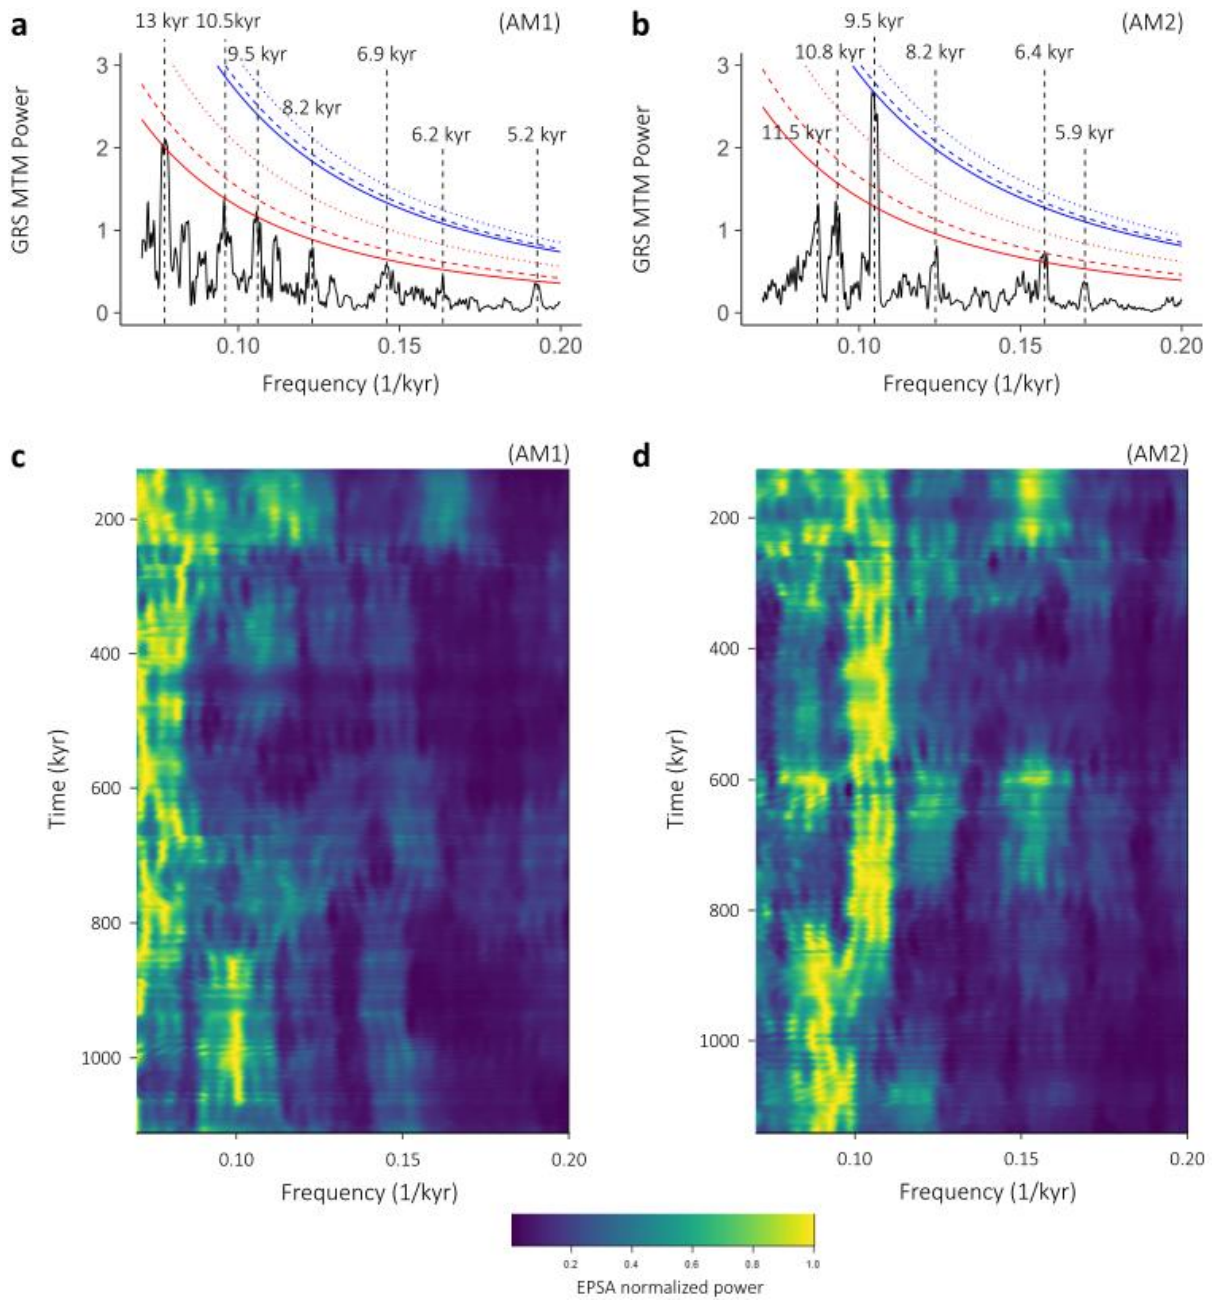

43

44 **Fig. S7. Spectral analysis of Sherburne Formation sub-Milankovitch cyclicity.** a) and b) MTM power spectrum  
 45 of tuned  $\gamma$  according to AM1 and AM2, respectively, including classical significance testing at 90, 95 and 99 %  
 46 confidence levels using an autoregressive model of order 1 (AR(1); red full, dashed and dotted red lines,  
 47 respectively) and Bonferroni corrections (blue), c) and d) evolutive power spectrum analysis (EPSA) normalized  
 48 power of tuned  $\gamma$  according to AM1 and AM2, respectively
